# Supplementary material
Source: Springer Nature journal article supplement (https://www.springermedizin.de/resource/supplementary/12935_2013_434_MOESM2_ESM.pdf/9540628)

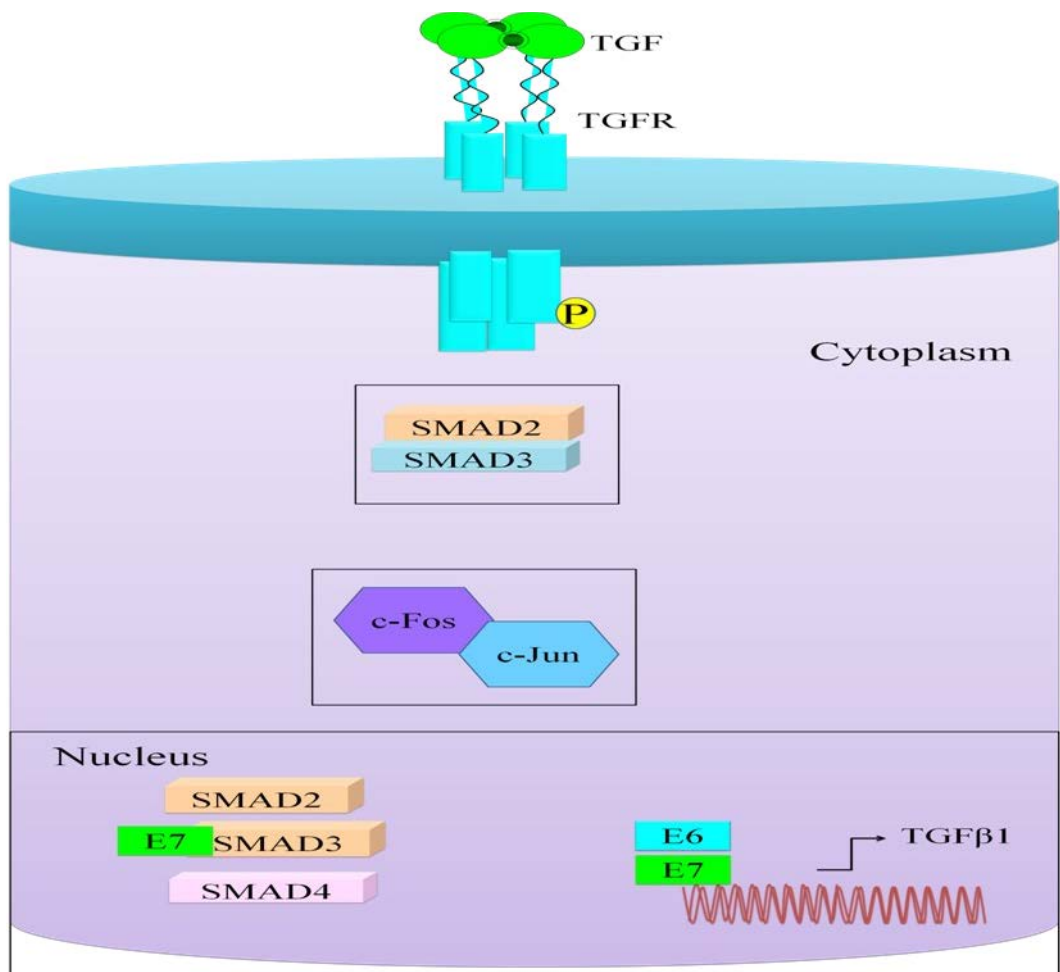

Supplement: MOESM2 [file 9540628]
